# Supplementary material
Source: MDPI journal article supplement (https://www.mdpi.com/2673-9976/4/1/5)
Supplement: s1 [file s1]

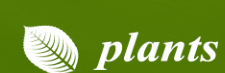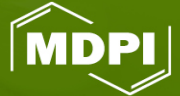

**Assessment of the genetic diversity of *Ulex europaeus*  
in Maui, California, Hawaii and New Zealand  
by a method of microsatellite markers**

**Mika Hozawa <sup>1,\*</sup>, Eiji Nawata <sup>2</sup>**

<sup>1,2</sup> Kyoto University, Address; Kitashirakawa Oiwakecho, Sakyo-ku, Kyoto, 606-8502

\* Corresponding author: hozawa.mika.x12@kyoto-u.jp

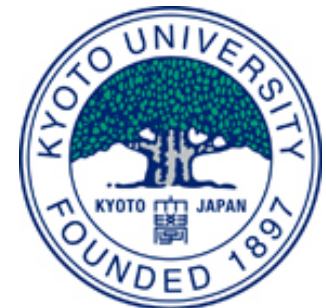

**Abstract:** One of the serious invasive, allohexaploid plant species, *Ulex europaeus* is originally from Western Europe and spreading to the world by some unknown pathways. Plants often show phenotypic plasticity according to the environments, but making it clear that the differences are derived from environmental or genetic effects is very important for further study. Thus, the aim of this study was to assess the genetic distances of *Ulex europaeus* from four different regions such as Maui, California, Hawaii and New Zealand. Microsatellite method which has been used frequently to test the genetic distances of the hexaploid plant species recently was used for the assessment because normal single nucleotide polymorphism (SNP) often shows genotypic ambiguity on hexaploids. We tested the leaf samples of 37 mother trees from four regions (Maui: 11, California: 4, Hawaii: 7, New Zealand: 15) at five microsatellite loci. After polymerase chain reaction analyses (PCR), dinucleotide-repeat motifs (DRMs) were counted and compared to test the genetic distances of the samples. As a result, dendrogram and analysis of molecular variance (AMOVA) showed that *Ulex europaeus* sampled in four different regions were genetically very close. If they show any morphological differences, they are inferred to be derived from environmental effects.

**Keywords:**1; allohexaploid 2; genetic distances  
3; invasive species 4; microsatellite 5; phenotypic plasticity

# *Ulex europaeus*

**100 noxious species by IUCN**

because ...

Strong **adaptation and propagation**  
ability

by producing **huge amount of seeds**  
in the pods

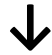

Hinder the growth of native species

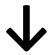

Change the ecosystem

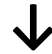

**Ecologically and economically**  
**troublesome**

but...

**Very difficult to control !!**

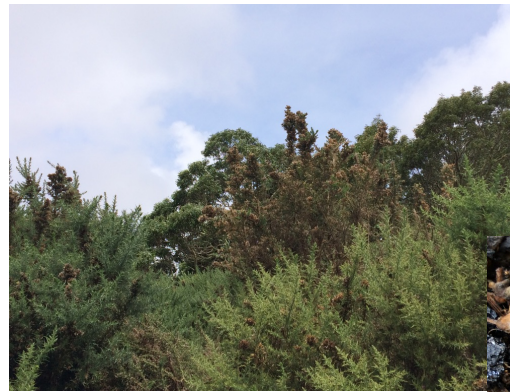

8/1/2019 Hawaii Island  
Mauna Kea

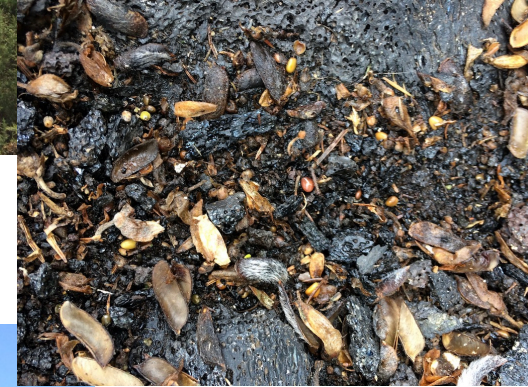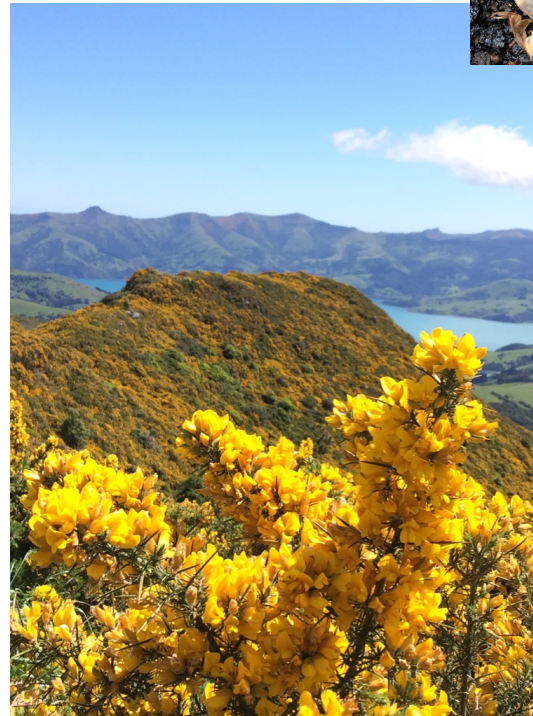

11/11/2017 New Zealand  
Akaroa

**IECPS**  
**2020**

# Distribution map of *Ulex europaeus* in the world

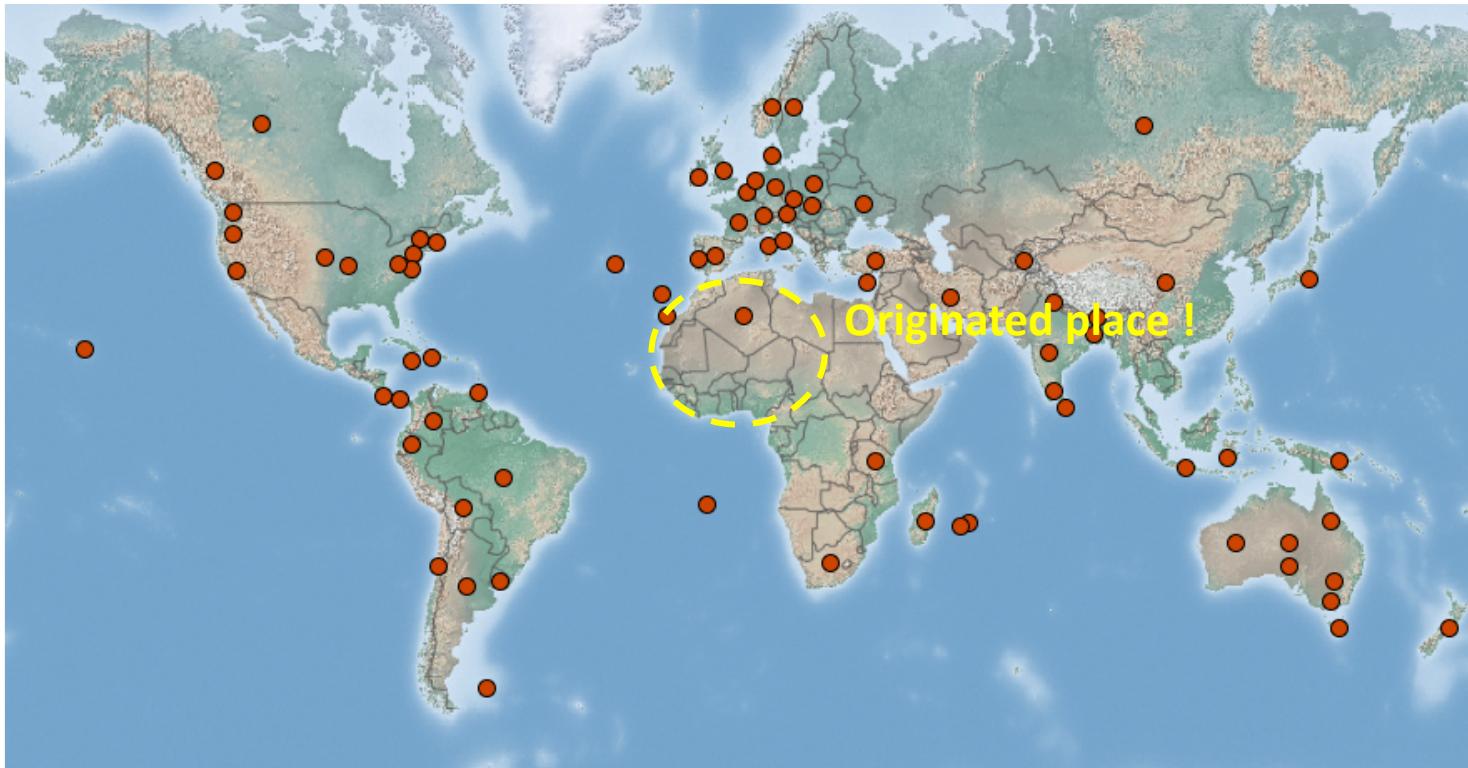

Invade and adapt even in the tropics...

Invasive Species Compendium

(<https://www.cabi.org/isc/datasheet/55561>, browsed on 10/1/2019)

IECPS  
2020

Research questions of this research is .....

Morphological differences may depend on the genetic differences??

- ★ Need to assess the **genetic distances** of *U. europaeus* samples taken for this study

**Are they far or close ?**

# Materials and Methods

Sampling sites...three regions, 36 mother trees, time...July 2016 to November 2017

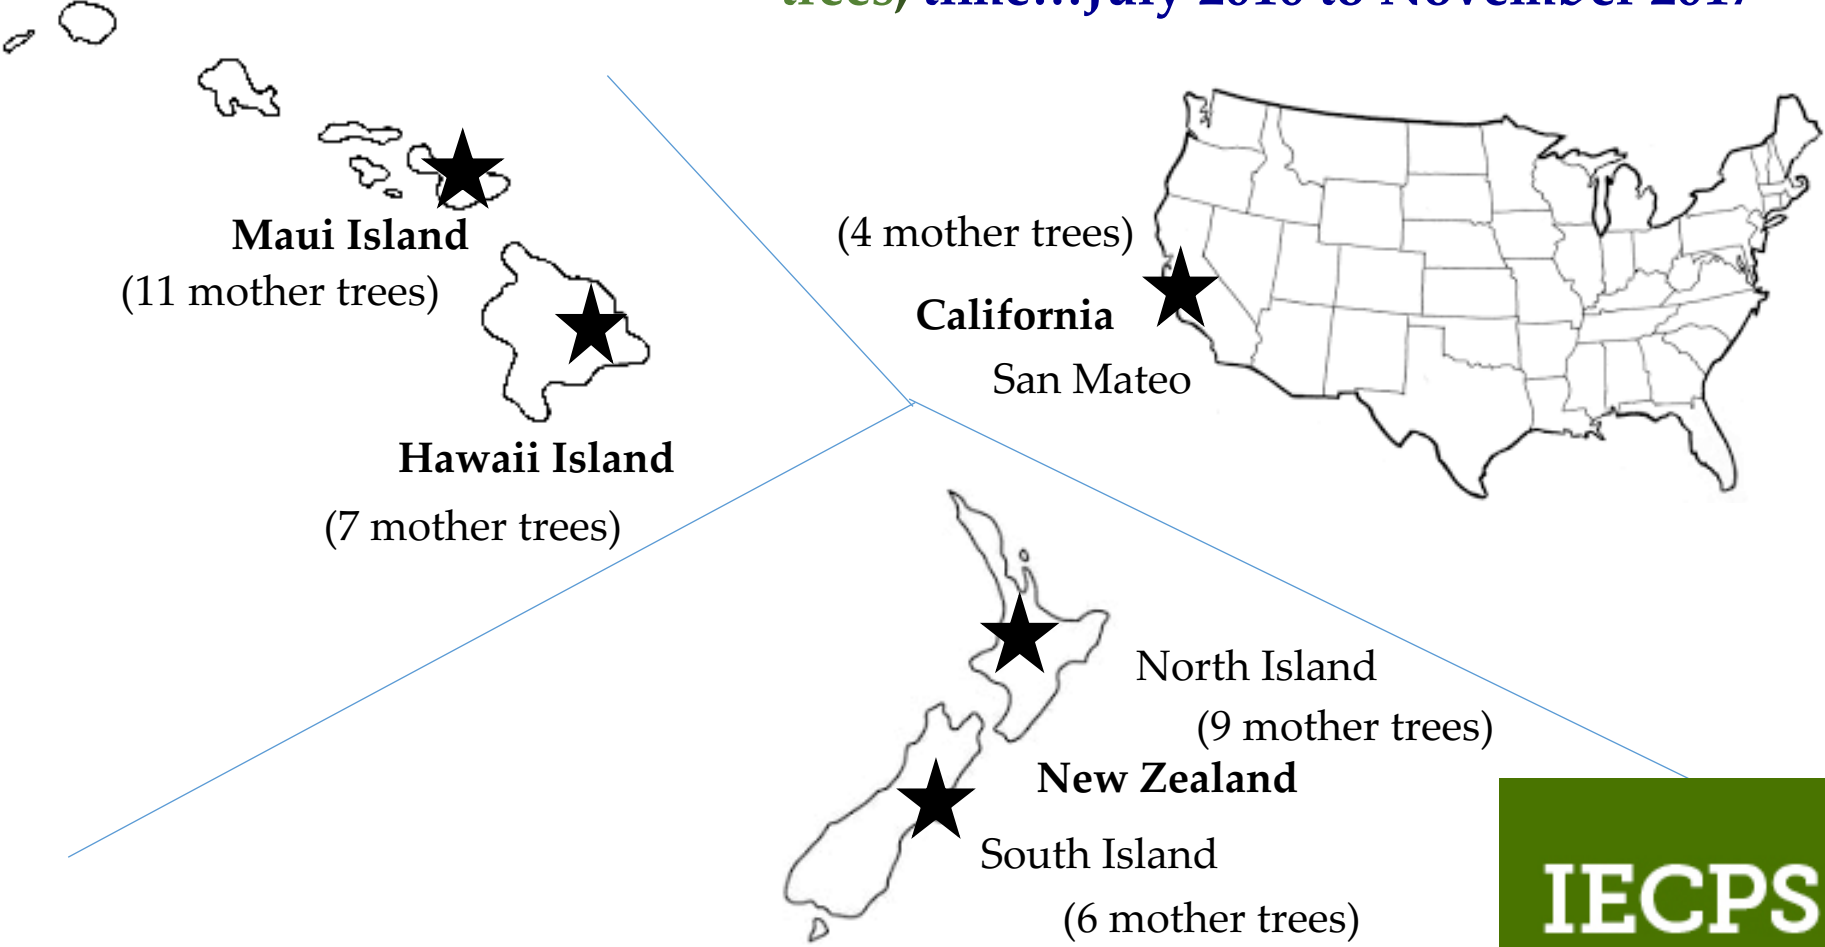

Figure 1. Sampling sites

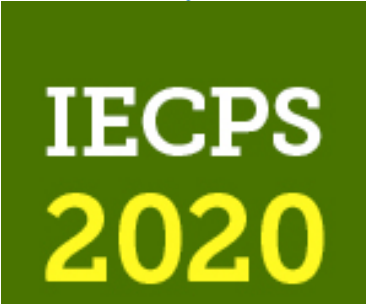

Table 1. Location and coordinates of *Ulex europaeus* sampled for PCR experiments.

| Location    | Mother tree | Latitude     | Longitude | Altitude (m) | Habitat                |
|-------------|-------------|--------------|-----------|--------------|------------------------|
| Maui        | #22         | N20.76       | W156.27   | 1758         | Ranch                  |
|             | #23         | N20.76       | W156.27   | 1823         | Ranch                  |
|             | #26         | N20.77       | W156.26   | 1767         | Ranch                  |
|             | #27         | N20.77       | W156.26   | 1763         | Ranch                  |
|             | #28         | N20.77       | W156.26   | 1763         | Ranch                  |
|             | #29         | N20.78       | W156.25   | 1773         | Ranch                  |
|             | #30         | N20.78       | W156.25   | 1768         | Ranch                  |
|             | #33         | N20.79       | W156.25   | 1656         | Ranch                  |
|             | #35         | N20.8        | W156.28   | 1060         | Forest                 |
|             | #36         | N20.8        | W156.28   | 1067         | Forest                 |
|             | #37         | N20.8        | W156.28   | 1046         | Forest                 |
|             | California  | #40,41,42,43 | N37.15    | W122.34      | 33, 33, 34, 31         |
| Hawaii      | #49         | N19.72       | W155.44   | 2004         | Ranch                  |
|             | #50         | N19.72       | W155.43   | 2058         | Ranch                  |
|             | #51         | N19.93       | W155.41   | 2015         | Ranch                  |
|             | #52         | N19.73       | W155.39   | 1952         | Ranch                  |
|             | #52-2       | N19.73       | W155.39   | 1952         | Ranch                  |
|             | #53         | N19.74       | W155.37   | 1929         | Ranch                  |
|             | #55         | N19.77       | W155.36   | 1980         | Ranch                  |
| New Zealand | N2-1, 2, 3  | S36.88       | E174.84   | 0            | Fallow land            |
|             | N5-1, 2, 3  | S37.86       | E175.82   | 97           | Roadside of a ranch    |
|             | N8-1, 2, 3  | S38.99       | E175.76   | 538          | Fallow land with grass |
|             | S1-1, 2, 3  | S43.8        | E173      | 623          | Ranch                  |
|             | S4-1, 2, 3  | S43.5        | E172.52   | 38           | Roadside of a ranch    |

**Tissue samples** of the leaves → Scratched on FTA<sup>®</sup> Plant Card (Whatman<sup>®</sup> Co., Ltd.) for **PCR** (Polymerase chain reaction)

Table 2. Five microsatellite loci used in the experiments

| Locus | Primers                          | [Primers]( $\mu$ M) |
|-------|----------------------------------|---------------------|
| A110  | F: 5'-CTATGGTGAATTTGTGATACAC-3'  | 0.35                |
|       | R: 5'-ACCTTGTTGCATCTTTACC-3'     |                     |
| A125  | F: 5'-GCATATACATACCCGAGGTAAG-3'  | 0.26                |
|       | R: 5'-AACCTGATGAAATGCACTATTC-3'  |                     |
| B4    | F: 5'-GGGCTCTGGCTCTGATAC-3'      | 0.2                 |
|       | R: 5'-TTGGATTAACCAACTTTCCTC-3'   |                     |
| B104  | F: 5'-GAACCTTATTCCTGGAATCTG-3'   | 0.3                 |
|       | R: 5'-CCCTTTTCTTTCCTTTCTTAAC-3'  |                     |
| B123  | F: 5'-AATTTGCCTGACATTGTTACTC-3'  | 0.22                |
|       | R: 5'-AGACCGTGTTTCATTATGGTTAG-3' |                     |

(Hornoy et al., 2013)



# PCR

**Enzyme**.....KOD FX Neo of TOYOBO Co., Ltd.

**Amount tested**.....25 $\mu$ L (12.5 $\mu$ L of buffer, 2.5 $\mu$ L of dNTP,  
9 $\mu$ L of deionized and sterilized water,  
0.4 $\mu$ L each of Primers (F and R), and 0.2 $\mu$ L of enzyme)

**In iCycler** (Bio Rad Laboratories, California, U.S.A) setting

Initial denaturation step at 94°C for 2 minutes,

35 cycles with 10 seconds denaturation at 98°C,

30 seconds hybridization of primers at 60°C

1 minute elongation at 68°C,

Final elongation step at 68°C for 7 minutes,

Check the condition of the bands at **electrophoresis** with 2% of agarose gel

↓  
**Next generation sequencing** of the PCR products  
by Takara Bio Inc. (Kusatsu, Shiga, Japan).

**FASTA data** were checked with software **ApE** (Utah University, free software)

**Dinucleotide-repeat motifs (DRMs)** of GT/TG, CT/TC, AG/GA, AG/GA, AG/GA (most common motifs found in five loci respectively) were counted by each locus using a software **SEAVIEW** (Guoy et al., 2010)

Because....

DRMs are the enhancers that express gene (Yanez-Cuna et al., 2014)

## **Analyses**

**Genetic diversity among and within populations** was estimated by the **analysis of molecular variance** with the software **GenAlEx** (Peakall and Smouse, 2006; 2012).

**Cluster dendrogram** was calculated and indicated by software **R ver. 3.3.2**.

# Results

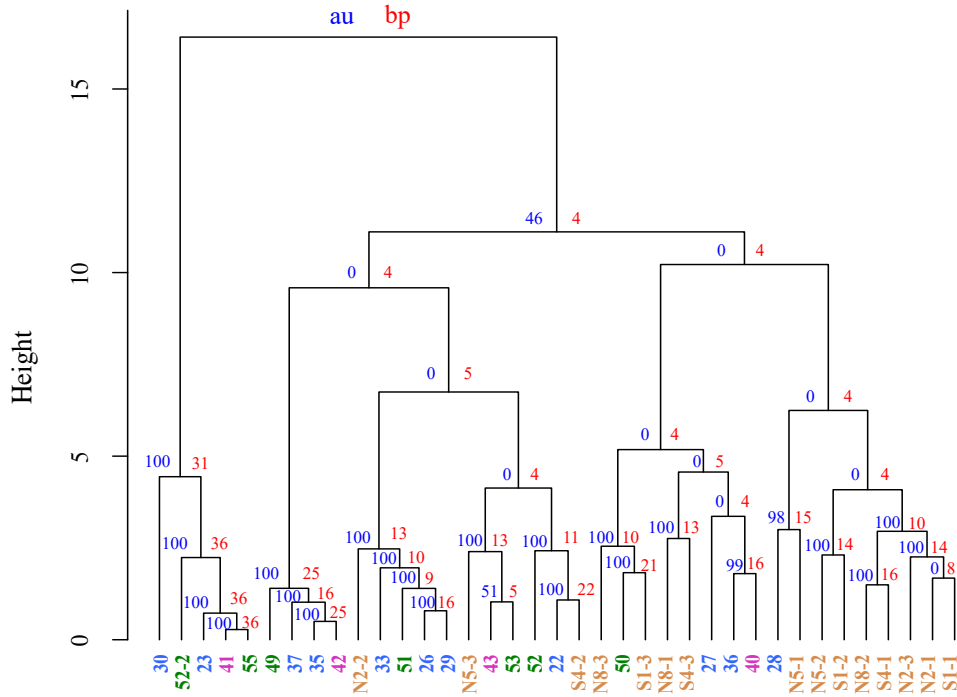

Figure 2. Dendrogram of *Ulex europaeus* sampled in Maui, California, Hawaii and New Zealand after 1000-bootstrap. NN: NZL North Island, NS: NZL South Island.

**Not making specific group by population**

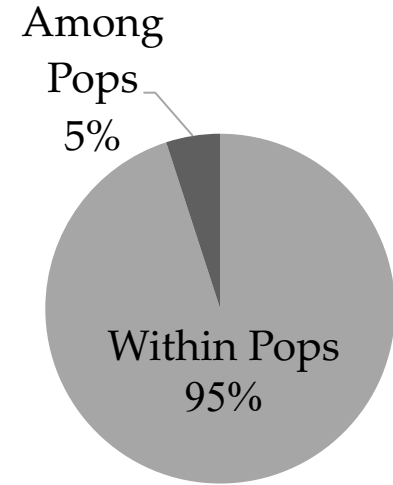

Figure 3. Percentages of Molecular variance among and within populations by AMOVA.

# Discussions

*U. europaeus* samples taken from 3 regions

From the results of **cluster analysis**

- ★ All the mother trees were **genetically mostly the same**

From the results of **AMOVA**

- ★ **Molecular variance** was mainly occurred **within populations**: 95% of the total variations.

**Inferred that they were genetically very close**

# Conclusion

The genetic distances of the samples taken from Maui, California, Hawaii, New Zealand were...

very close

Morphological differences, if any, are inferred to be derived from environmental effects such as climatic and geological effects

**Benchmark of the further study**

IECPS  
2020

# Supplementary Materials

Table 4. Results of the molecular variance of *U. europaeus* sampled in 3 regions for this study. Probability, P (rand  $\geq$  data), for PhiPT is based on standard permutation across the full data set.

| Source      | df    | SS                   | MS     | Est. Var. | %    |
|-------------|-------|----------------------|--------|-----------|------|
| Among Pops  | 4     | 2960.2               | 740.05 | 27.79     | 5%   |
| Within Pops | 32    | 17276.99             | 539.91 | 539.91    | 95%  |
| Total       | 36    | 20237.19             |        | 567.69    | 100% |
|             |       |                      |        |           |      |
| Stat        | Value | P (rand $\geq$ data) |        |           |      |
| PhiPT       | 0.05  | 0.11                 |        |           |      |

Pescadero, California, USA (16 Jul/16)

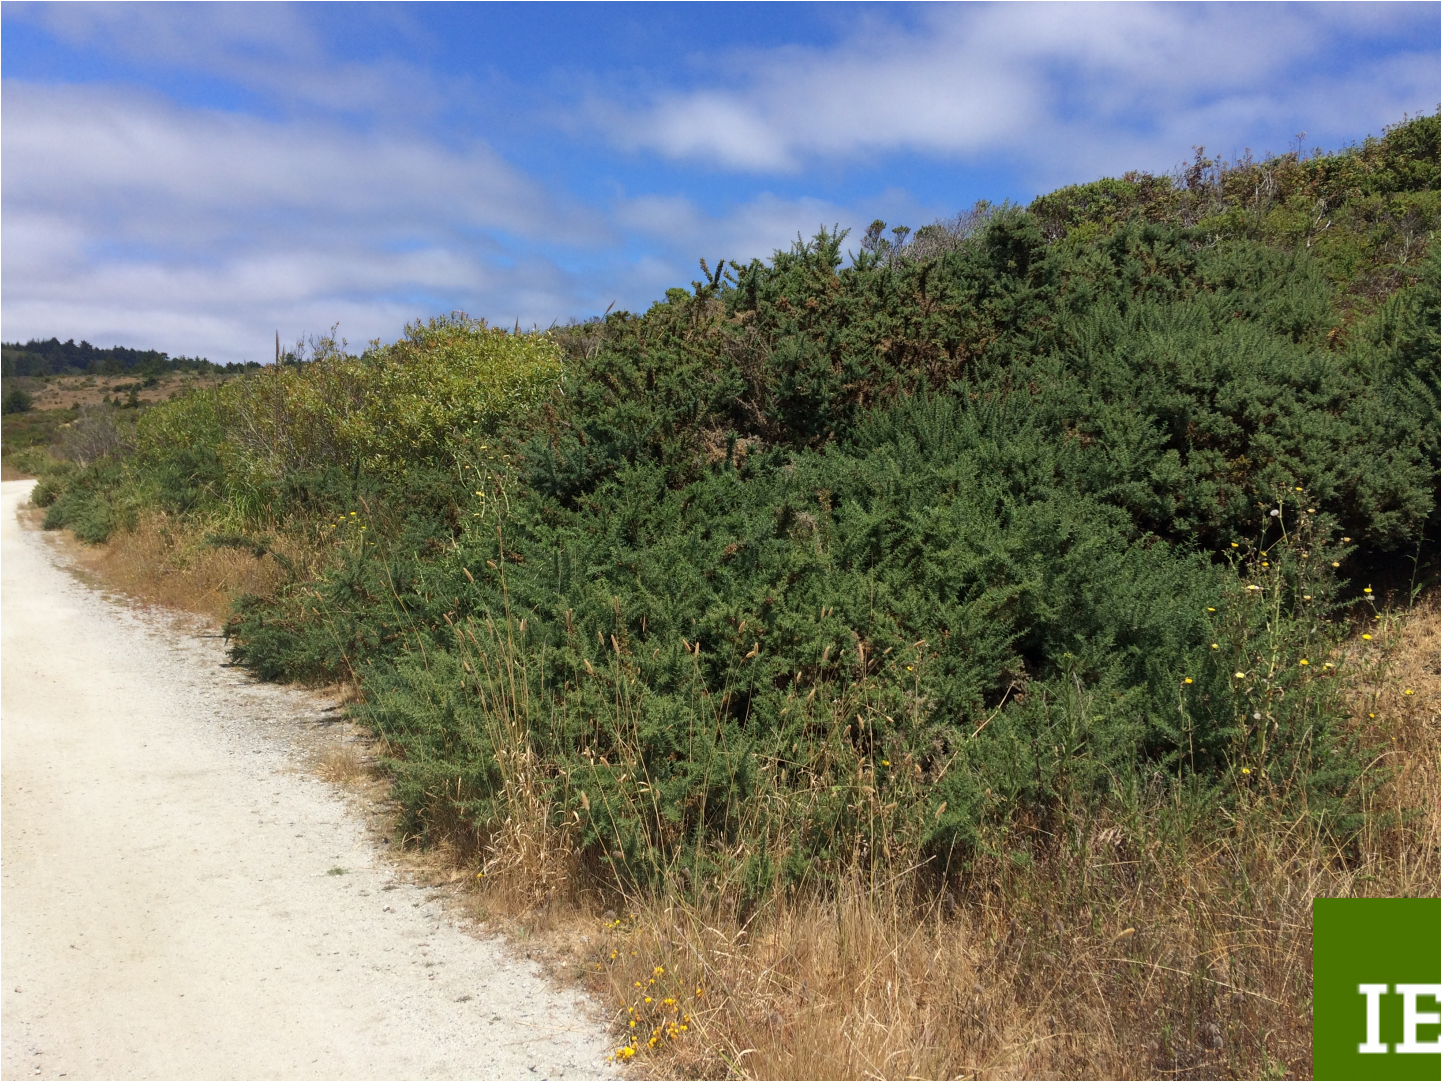

**IECPS**  
**2020**

Akaroa, NZL, South Island (11 Nov/17)

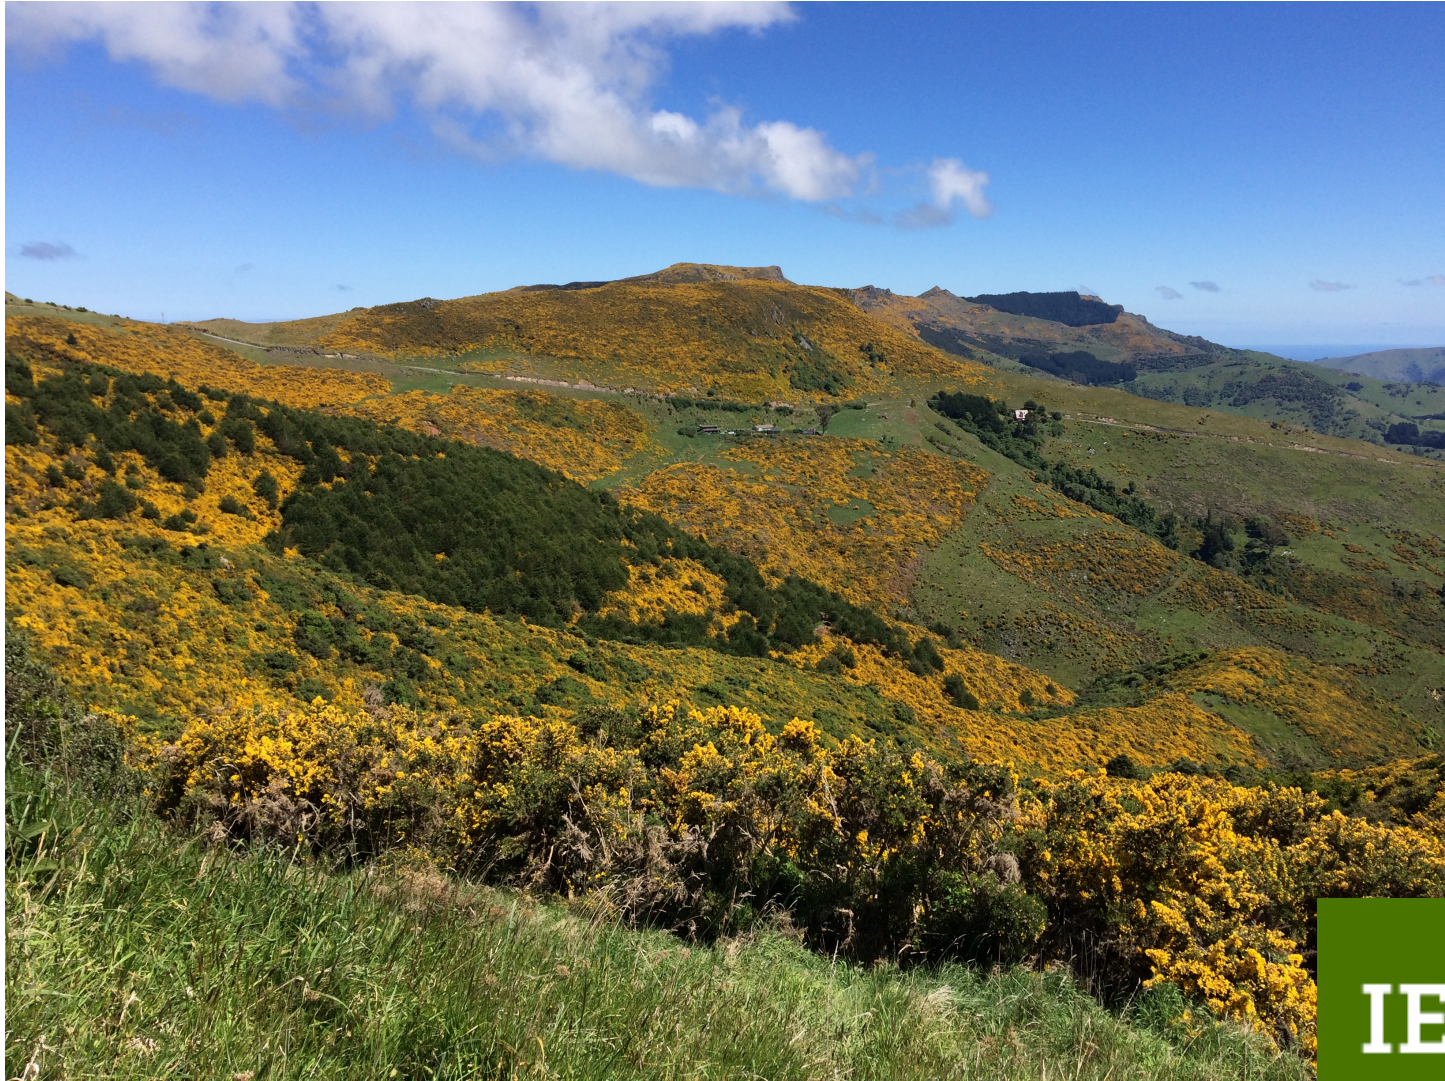

IECPS  
2020



Along Saddle Road, Mauna Kea, Hawaii (17 Feb/20)

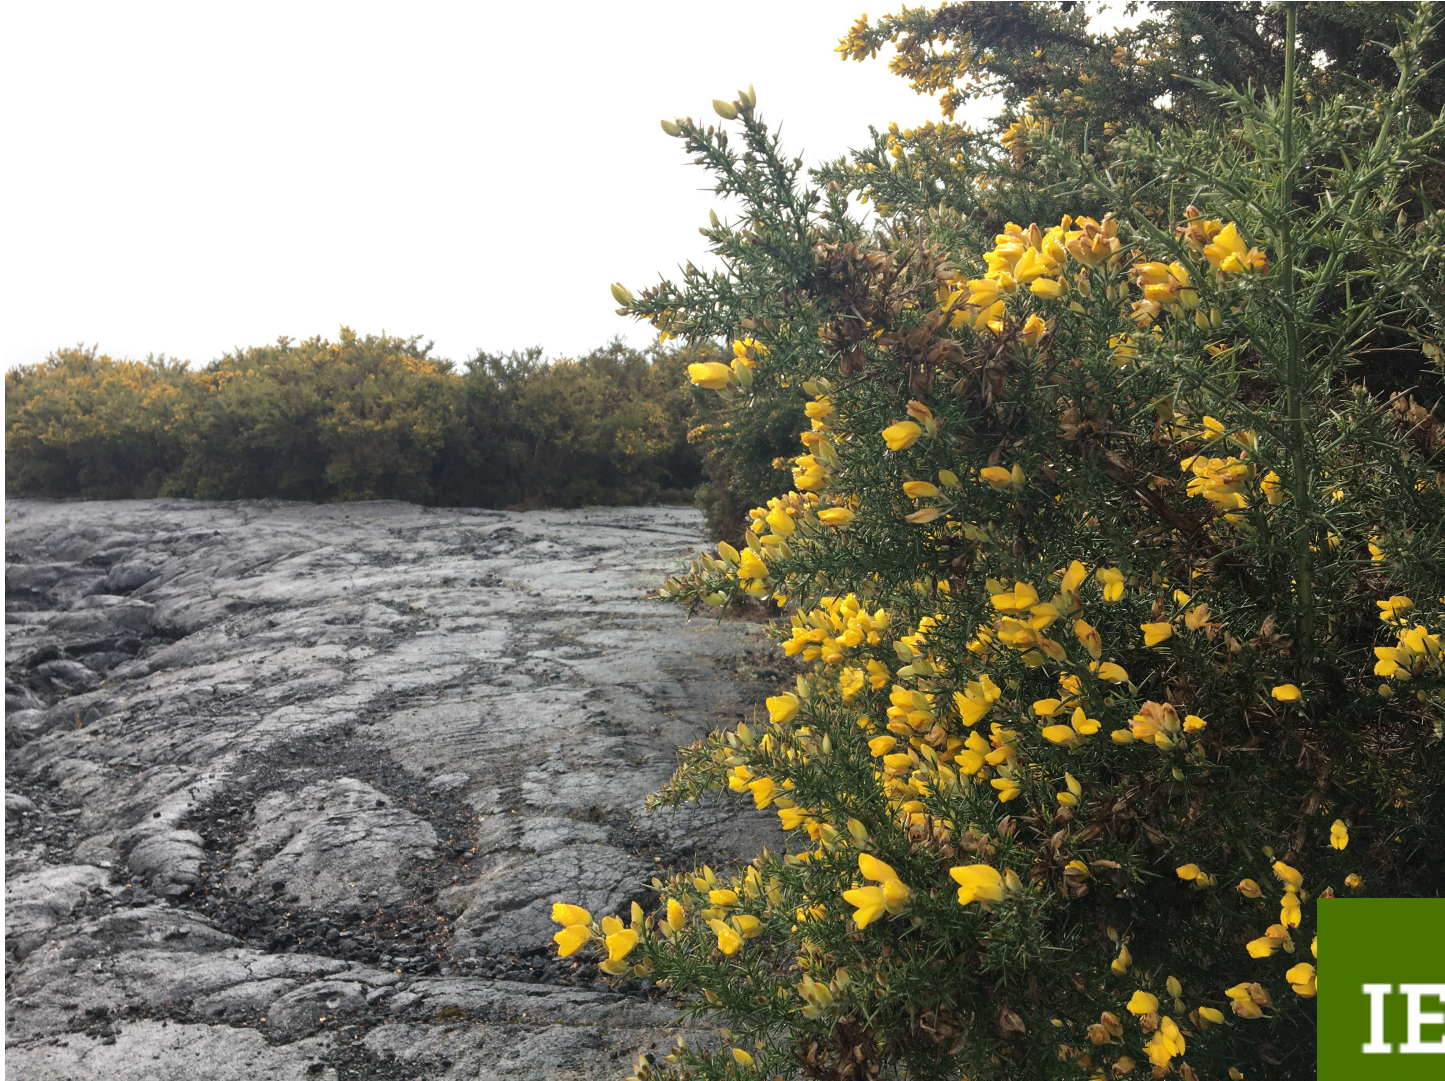

IECPS  
2020

# Springfield, Canterbury, NZL South Island (12 Nov/17)

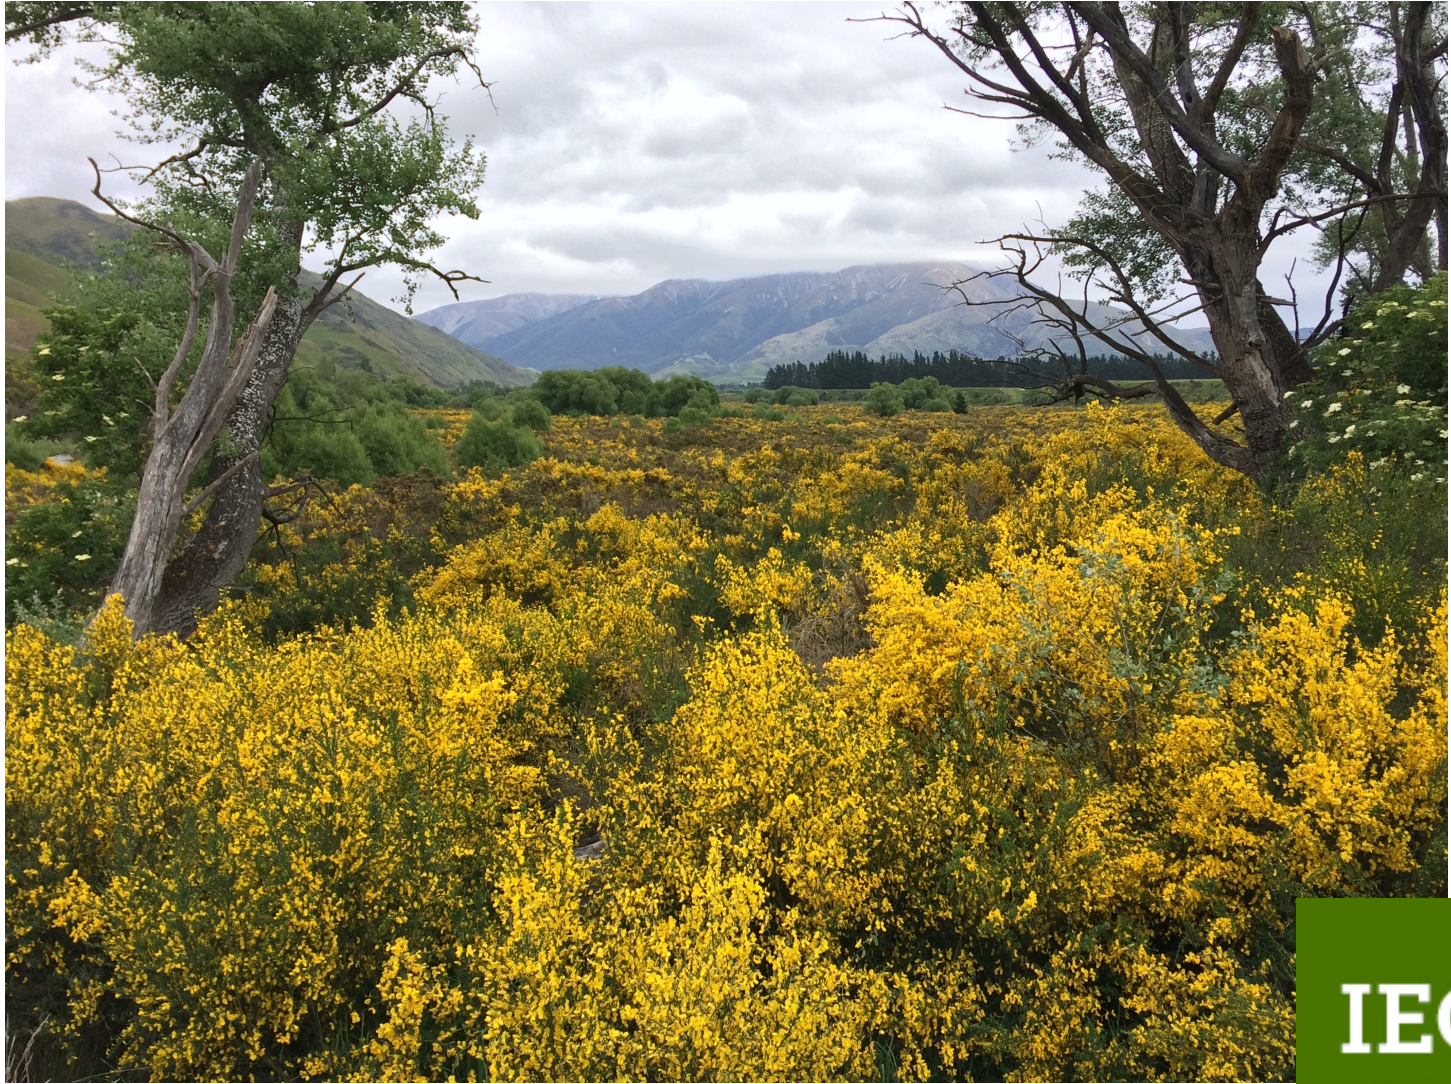

IECPS  
2020

# Acknowledgments

Dr. J.B. Friday with the [University of Hawaii at Manoa](#)

Dr. Pamela Scheffler with [Hawaii Community College](#)

[Landcare Research](#) and [AgResearch](#) of New Zealand

[US Fish and Wildlife Service](#) in Hakalau

Land Manager, Mr. Jordan Jokiel of [Haleakala Ranch](#)

This study was partly supported by a [JSPS KAKENHI](#) Grant  
(Grant No. 26257418).

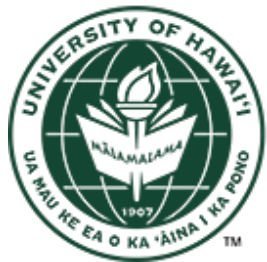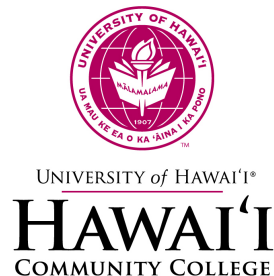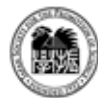

JAPAN SOCIETY FOR THE PROMOTION OF SCIENCE  
日本学術振興会

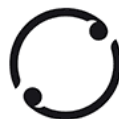

Manaaki Whenua  
Landcare Research

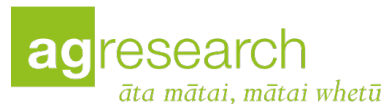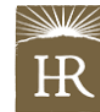

HALEAKALA RANCH  
• EST. MAUI 1888 •

IECPS  
2020
